# Supplementary material
Source: MDPI journal article supplement (https://www.mdpi.com/2073-4441/12/2/528)

## Supplementary Materials

# Enhancing runoff prediction in ungauged watersheds combining catchment-physical and hydrologic similarity in sub-tropical regions

Santiago Narbondo <sup>1</sup>, Angela Gorgoglione <sup>1,\*</sup>, Magdalena Crisci <sup>1</sup> and Christian Chreties <sup>1</sup>

<sup>1</sup> Department of Fluid Mechanics and Environmental Engineering (IMFIA), School of Engineering, Universidad de la República, 11200 Montevideo, Uruguay, snarbondo@fing.edu.uy (S.N.), mcrisci@fing.edu.uy (M.C.), chreties@fing.edu.uy (C.C.)

\*Correspondence: agorgoglione@fing.edu.uy (A.G.)

### Contents:

**SM-1:** Calculation of the amount of available water content ( $AD$ ).

**SM-2:**  $T_c$  and  $x_4$  power relationships.

**SM-3:** Range of variation of NSE in the last stage of the cross-validation process (validation).

**SM-4:** Comparison between observed and simulated flow-duration curve.

**SM-1:** Calculation of the amount of available water content (*AD*).

$$FC (A \text{ horizon} - \text{no sand}) = 21.977 - 0.168(S\%) + 2.601(OM\%) + 0.127(C\%) \quad (I)$$

$$FC (A \text{ horizon} - \text{sand}) = 8.658 + 2.571(OM\%) + 0.296(L\%) \quad (II)$$

The value 59.6% of sand was considered as a threshold to classify A horizon as “no sand” (< 59.6%) and “sand” (> 59.6%).

$$CC (B \text{ horizon}) = 18.448 - 0.125(S\%) + 1.932(OM\%) + 0.295(C\%) \quad (III)$$

$$PWP (A \text{ or } B \text{ horizon}) = -58.1313 + 0.5682(S\%) + 0.3718(OM\%) + 0.9755(C\%) + 0.6414(L\%) \quad (IV)$$

$$Da = 3.6725 - 0.0210(S\%) + 0.0531(OM\%) + 0.0221(C\%) + 0.0228(L\%) \quad (V)$$

where *FC* represents the field capacity, *PWP* is the permanent wilting point, *Da* is the apparent density, and *S%*, *OM%*, *C%*, *L%* represent the percentage of sand, organic matter, clay, and silt respectively.

Eq. (IV) is valid for A and B-horizons.

Once the *FC* and *PWP* were obtained, the amount of available water content for each horizon was calculated (*AD<sub>H</sub>*):

$$AD_H = FC - CMP \quad (VI)$$

These values were multiplied by the respective apparent densities (*Da<sub>H</sub>*) and thicknesses (*h<sub>H</sub>*) to transform the content of available soil moisture in weight to volume and millimetres:

$$AD_H(\% \text{ water weight}) = FC(H\% \text{ water weight}) - CMP(H\% \text{ water weight}) \quad (VII)$$

$$AD_H(H\% \text{ water volume}) = FC(H\% \text{ water weight}) - CMP(H\% \text{ water weight}) \quad (VIII)$$

$$AD_H(mm) = AD_H(H\% \text{ water weight}) \cdot Da_H \cdot h_H/10cm \quad (IX)$$

$$AD_S(mm) = \sum AD_H (mm) \quad (X)$$

where  $H\%$  is the soil moisture and  $ADS$  is the amount of available water content in the soil.

These calculations were made on the basis that the horizons granulometric is fully composed by fine soil (less than 2 mm).

**SM-2:**  $T_c$  and  $x_4$  power relationships.

The best approximation to the  $T_c$  and  $x_4$  was obtained using a relationship described by power law. These curves are graphically reported below and the following one has been considered as an average curve that represents all of them:

$$x_4 = 1.24 \cdot T_c^{0.205}$$

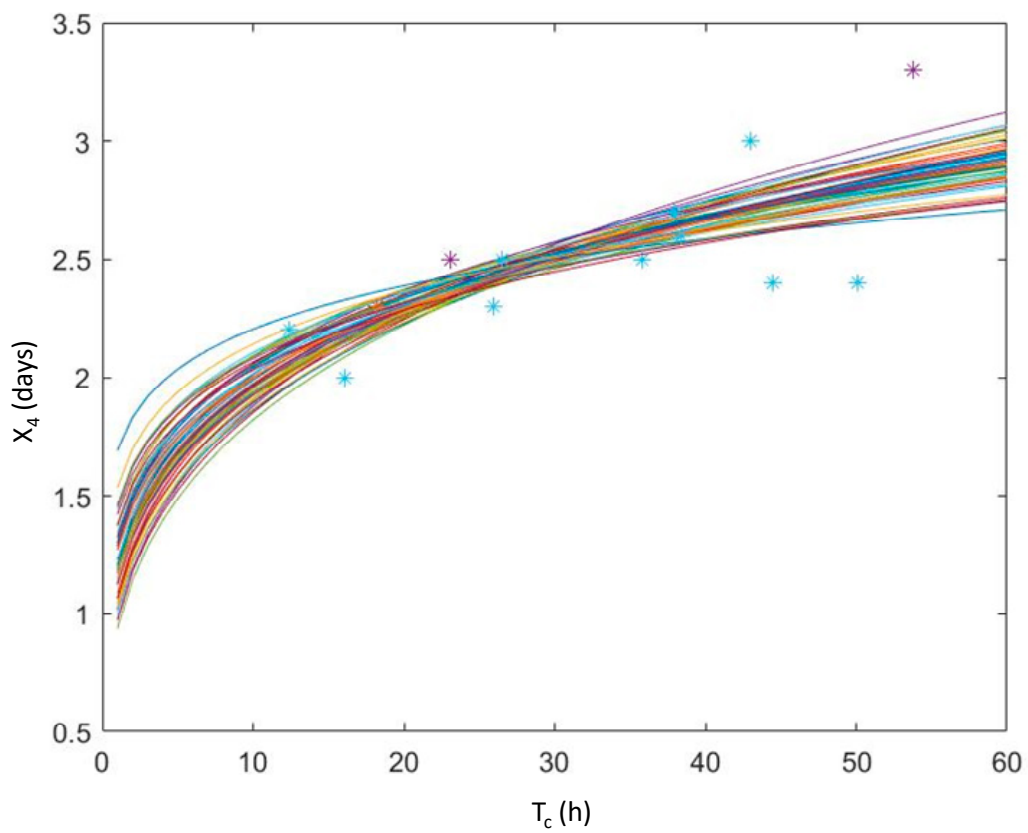

**SM-3:** Range of variation of *NSE* in the last stage of the cross-validation process

(validation).

| <b>Basin</b>      | <b>NSE max</b> | <b>NSE min</b> |
|-------------------|----------------|----------------|
| Casupa            | 0.75           | 0.5            |
| Cebollati         | 0.81           | 0.61           |
| Cuareim           | 0.76           | 0.5            |
| Dayman            | 0.81           | 0.49           |
| Maldonado         | 0.75           | 0.48           |
| Olimar            | 0.77           | 0.48           |
| San Carlos        | 0.8            | 0.47           |
| San Salvador      | 0.7            | 0.48           |
| Santa Lucía       | 0.75           | 0.48           |
| Santa Lucía Chico | 0.68           | 0.49           |
| Tacuarembó Chico  | 0.81           | 0.57           |
| Tacuari           | 0.74           | 0.5            |
| Yi                | 0.73           | 0.49           |

**SM-4:** Comparison between observed and simulated flow-duration curve.

Comparison between observed (red line) and simulated flow-duration curve (blue line) at Tacuarembó Chico watershed.

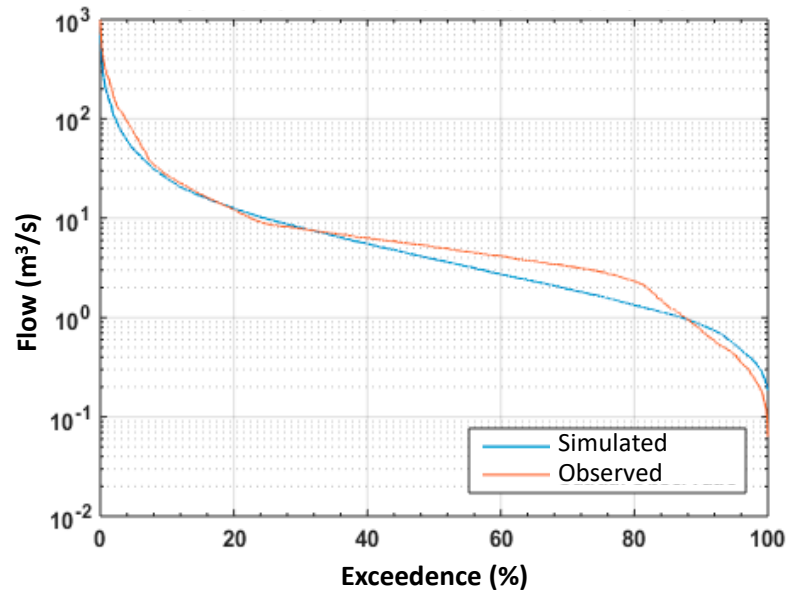

Supplement: s1 [file s1]
